# Supplementary material for: Multidecadal ozone trends in China and implications for human health and crop yields: A hybrid approach combining chemical transport model and machine learning
Source: Copernicus journal article supplement (doi:10.5194/egusphere-2023-1052), 2023-06-08
Supplement: Supplementary file [file egusphere-2023-1052-AC1-supplement.pdf]

**Responses to Reviewers' Comments on "Multidecadal ozone trends in China and implications for human health and crop yields: A hybrid approach combining chemical transport model and machine learning" by Mao et al. (MS No.: acp-2023-1052)**

We would like to thank the reviewers for the thoughtful and insightful comments. The manuscript has been revised accordingly, and our point-by-point responses are provided below. The reviewers' comments are *italicized*, our replies are in black font, and our new/modified text cited below is highlighted in **bold**.

**Response to Referee #1**

*The aims of the presented study are to 1) use improved finer high-resolution hourly ozone data to assess ozone impacts on human health and crop yields over the past four decades in China, and 2) use the findings to offer more comprehensive policy implications for mitigation of ozone-related impacts across China. The research conducted is interesting and beneficial to the agricultural, modeling, and health fields, mainly in China. The study is well described, however, there are some minor issues that hinder the clarity. Minor revision is recommended before acceptance.*

We thank the reviewer for the very helpful comments. The paper has been revised accordingly to address the reviewer's concerns point by point, and all changes are cited and discussed in the responses below.

*Why were the BTH, SCB, YRD, and PRD given more detailed analysis compared to other regions? Which areas correspond more to agricultural production or human health? This should be stated.*

We thank the reviewer for the comments. The BTH, SCB, YRD, and PRD are hotspots of O<sub>3</sub> pollution in China mostly due to the high level of industrialization and urbanization. Moreover, these regions are densely populated (Wang et al., 2018) and major agricultural areas in China (Monfreda et al., 2008). These regions may face greater burdens of crop yield and human health losses with high O<sub>3</sub> concentrations, and are therefore given more detailed analysis here. We now state these more clearly in the manuscript:

P12 L362: "...The regional characteristics of O<sub>3</sub> and its influencing factors will be further discussed in Section 3.4. **The BTH, SCB, YRD, and PRD regions have been identified as hotspots of O<sub>3</sub> pollution in China. These regions are characterized by high population density (Wang et al., 2018) and are also major agricultural areas (Monfreda et al., 2008), which may face greater burdens of crop yield and human health losses with high O<sub>3</sub> concentrations. Therefore, here we provide more detailed analysis and investigation of these regions.**"

P20 L579: "Despite these limitations, our study represents important progress in evaluating the long-term, multidecadal health burdens and agricultural losses resulting from O<sub>3</sub> pollution in China. **Across the four major regions, BTHs experience the highest RYLs for major crops due to elevated O<sub>3</sub>. On the other hand, the YRD and PRD regions have greater human health losses primarily due to their large population size.**"

*The authors state that the findings can offer more comprehensive policy implications for mitigation of O<sub>3</sub>-related impacts, but do not mention any policy implication in the Conclusion/discussion section. This should be added to the Conclusion.*

We now discuss the policy implications and possible efforts more fully in the Conclusions and Discussion section.

P20 L582: "...The results can provide important references for governments and agencies when making related national or regional policies to meet the imperative environment, health, and food security demands. **To effectively address O<sub>3</sub> impacts, collaborative efforts can be made in multifaceted aspects: (1) to implement stricter regulations and specific emission control measures for major ozone precursors from industrial, vehicular and agricultural sources that account for region-specific chemical, meteorological and terrestrial conditions; (2) to encourage the adoption of more sustainable and adaptive agricultural practices that minimize O<sub>3</sub> exposure and its damage on crops (e.g., cultivating O<sub>3</sub>-resistant crop varieties); (3) to improve short-range O<sub>3</sub> forecast capabilities of regional models, especially with the enhancement of artificial intelligence technology, which may enable better early warning systems to prepare the public and farmers for O<sub>3</sub> episodes; (4) to raise public awareness via promotional campaigns and educational programs to inform individuals, communities, and farmers about the risks associated with O<sub>3</sub>. It is important for policymakers to consider these suggestions and act to effectively mitigate the negative O<sub>3</sub> impacts.**"

*Specific comments:*

*Lines 181-182: "...datasets at different spatial resolutions were all regridded to a unified resolution of 0.25 x 0.25...". How were they regridded/downscaled/aggregated? Please describe the methods used.*

The method was introduced in revised manuscript.

P5 L177 "...Because the representation of input data for LightGBM should be regular, datasets at different spatial resolutions were all regridded to a unified resolution of 0.25°×0.25° **with the operationally used bilinear interpolation approach (e.g., Accadia et al., 2003)**, consistent with the meteorological fields.

*Line 214: "It has been suggested that, suggesting..." please clarify sentence.*

The sentence was revised as suggested.

*Line 219: Should be referencing Table S2 instead of Table S1. Switch Table S2 and S1 in the supplementary since Table S2 is mentioned first.*

All Table/Figure order and referencing has been checked and revised.

*Line 239: Should be referencing Table S4 instead of S2. All Table/Figure order and referencing should be checked.*

All Table/Figure order and referencing has been checked and revised.

*Figure 2 x-axis label should be "Feature importance". May be better to put label below x-axis instead of above plot.*

The label was added below x-axis as suggested.

*Line 276: Mention RMSE in µg m<sup>-3</sup> instead of ppb for consistency with other results presented.*

The unit was changed to µg m<sup>-3</sup> for consistency.

*Line 393: Should be referencing Table S3 instead of Table S1.*

All Table/Figure order and referencing has been checked and revised.

*Lines 395-396: “Previous studies reported...in the planetary boundary layer (PBL), etc.” Cite studies mentioned and remove “etc.”.*

The relevant references were added.

*Line 421: Should be referencing Table S3 instead of Table S2.*

All Table/Figure order and referencing has been checked and revised.

*Line 528: Use “RYL” instead of “RLY”.*

The same typo was revised through the whole draft.

## **Response to Referee #2**

*The manuscript utilized a machine learning algorithm, i.e., LightGBM, to bias-correct surface ozone estimates by the GEOS-Chem model during 1981-2019 in China. The results show that the accuracy of the simulated surface ozone estimates was considerably improved. The authors employed these improved surface ozone estimates to assess the extent to which crop yields and human health were impacted in China. Overall, the topic is of interest to the audience and the manuscript is generally well written and organized. However, before I can only recommend it to be accepted by the EGU sphere journal, the manuscript needs some major revision.*

We thank the reviewer for the very helpful comments. The paper has been revised accordingly to address the reviewer’s concerns point by point, and all changes are cited and discussed in the responses below.

*The surface ozone concentration measurements were obtained only for the period 2016-2018, whereas there are longer records. The authors need to clarify why they only adopted observations in such a short period to train and test the LightGBM model.*

We thank the reviewer for the very relevant comment. The surface ozone concentration measurements in China were available since in 2013 with relative scarce sites in the first few years. During the model training process, we found that the training time was approximately linearly related to the number of samples when altering the size of the training dataset, and a timescale of two years appears to strike a good balance between computational burden and utility for an operational system such as air quality forecasting (**Fig. R1**). To optimize computational efficiency without compromising model robustness and accuracy, we utilized observations from the period 2016-2017 as the training data, and observations in 2018 as the independent test data.

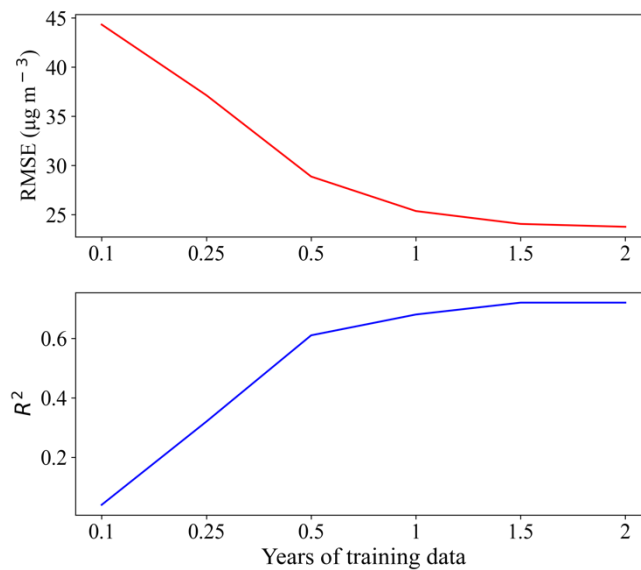

**Figure R1.** Testing statistics with increasing length of training data for MDA8-O<sub>3</sub>.

We now emphasize these in P6 L203 “...**Our analysis revealed that training the model with one year or more of data results in only marginal reductions in RMSE and enhancements in  $R^2$  (Fig. S1); thus a timescale of two years appears to strike a good balance between computational burden and model accuracy. These results align with the findings of Ivatt and Evans (2020), who suggested that much of the variability in the power spectrum of surface O<sub>3</sub> can be captured by timescales of a year or less. Therefore, here we utilized observations from the period 2016-2017 as the training data, which offered a more economical computing cost and improved training time efficiency, and observations in 2018 as the independent test data to evaluate model performance.**”

Fig.R1 is also added as Fig. S1 to the supplementary materials.

*There is a scale mismatch between ground observations and GEOS-Chem estimate for a grid, i.e., there may be multiple ground sites within a 0.25x0.25 grid cell. How did the authors handle this issue?*

We thank the reviewer for the comments. First and foremost, it is worth noting that the observations were only used for the purpose of model evaluation to assess the accuracy and robustness of the model. The handling method is now explained in greater detail:

P6 L197 “...**During evaluation, the model results in the grid cell covering or closest to each site were utilized to compare with observations. This approach of comparing model simulated gridded air pollutant concentrations (either from a CTM or ML model) against site-level observations has been commonly used to evaluate model performance (Ma et al., 2021; Meng et al., 2022; Thongthammachart et al., 2021). Additionally, when comparing the GEOS-Chem-simulated O<sub>3</sub> with observations, the simulated O<sub>3</sub> was first regridded to 0.25°×0.25° using the operationally used bilinear interpolation approach to maintain consistency with the ERA5 dataset.**”

*The GEOS-Chem simulations used the MERRA2 climate dataset, while the LightGBM used ERA5 climate data. The difference between the two climate datasets will be transferred into the LightGBM model training, which potentially*

impedes the machine learning model to capture the biases between GEOS-Chem estimates and ground observations. The authors need to analyze the uncertainty propagation.

We thank the reviewer for the comments. To provide long-term GEOS-Chem simulated O<sub>3</sub> fields for incorporation into the ML model, we conducted GEOS-Chem simulations at a resolution of 2.0°×2.5° as higher resolutions of GEOS-Chem in nested grids are available but computationally prohibitive for multi-decadal simulations. Therefore the MERRA2 climate dataset used to drive GEOS-Chem also has a resolution of a horizontal resolution of 2.0°×2.5°. We trained the model with MERRA2 dataset; however, the results show the higher-resolution ERA5 dataset performed better in reproducing observed O<sub>3</sub> concentrations with smaller RMSE and larger R<sup>2</sup> (**Fig. R2**) even though MERRA2 was first regridded to a resolution of 0.25°×0.25° consistent with ERA5 dataset. This analysis demonstrates the level to which higher-resolution meteorological data as opposed to the lower-resolution default MERRA2 data may help enhance the performance of the hybrid model, and the differences can be attributed to the differences in meteorological datasets.

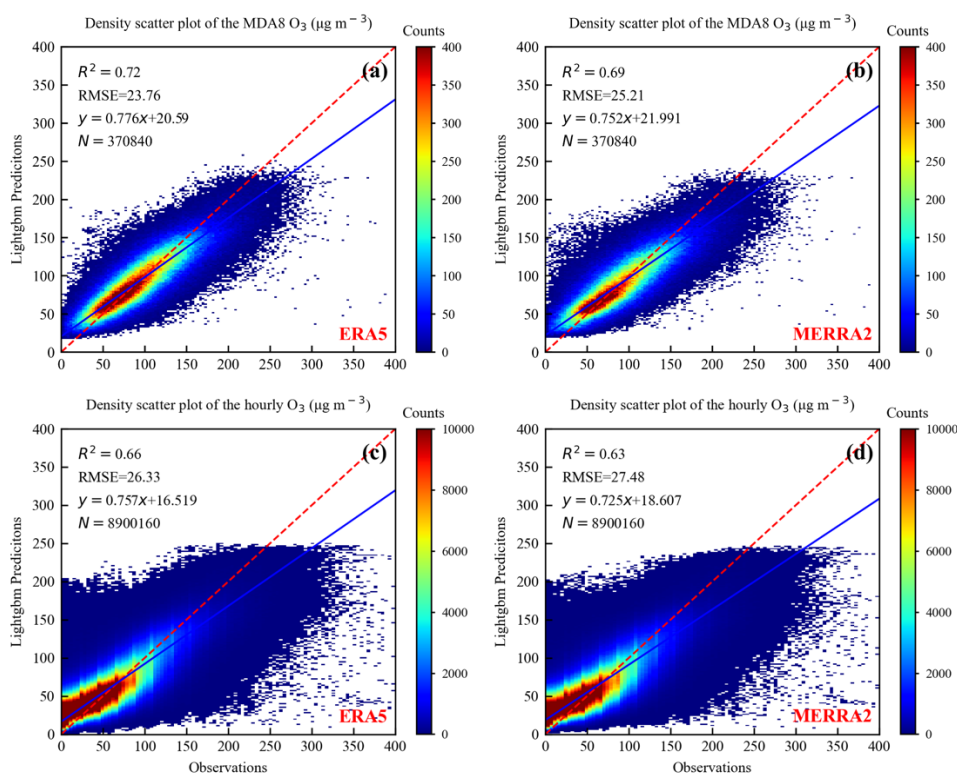

**Figure R2.** Density scatter plots and linear regression statistics of LightGBM bias-corrected O<sub>3</sub> predictions vs. observation for 2018: (a) MDA8-O<sub>3</sub> using ERA5 meteorology vs. observations; (b) MDA8-O<sub>3</sub> using MERRA2 meteorology vs. observations; (c) hourly O<sub>3</sub> using ERA5 meteorology vs. observations; and (d) hourly O<sub>3</sub> using MERRA2 meteorology vs. observations. The dashed red line indicates the 1:1 line, and the solid blue line indicates the line of best fit using orthogonal regression. The R<sup>2</sup> is the coefficient of determination, RMSE is the root-mean-square error, and N is the number of data points. The X and Y axis represents the O<sub>3</sub> observations and predictions, respectively.

Because the objective of our study is to reproduce more reliable O<sub>3</sub> concentrations using the most comprehensive relevant data as much as possible, the greatest attention is given to the accuracy of the hybrid model rather than the biases of the GEOS-Chem model caused by errors in input data. In summary, with a higher prediction accuracy, the

hybrid approach lends greater credence to using model simulations to extrapolate historical O<sub>3</sub> further back in time, which can furthermore provide us with more accurate estimates of O<sub>3</sub> impacts on crop production and human health.

We now emphasize these in P8 L270 “... **The MERRA2 dataset driving GEOS-Chem was also used to train the model; however, we found that the higher-resolution ERA5 dataset performs better in reproducing observed O<sub>3</sub> concentrations with smaller RMSE and larger  $R^2$  (Fig. S3). This analysis demonstrates the level to which a higher-resolution meteorological dataset, despite not being strictly consistent with the input meteorology for the CTM, can help enhance the performance of the hybrid model. In summary, the result suggests that the CTM-simulated results can be substantially improved by applying ML with multi-source datasets, and the bias-corrected data can improve our understanding of long-term O<sub>3</sub> trends and its further implications on crop and human health over China, as discussed in the following sections.**”

P19 L515 “... **In the model training process, we found that utilizing a higher-resolution meteorological dataset, albeit one that is not the same as the default CTM input meteorology, has high potential to enhance the performance of the hybrid model in reproducing observed O<sub>3</sub> concentrations.**”

Fig. R2 is also added as Fig. S3 to the supplementary materials.

*In the abstract, the manuscript writes that meteorological factors play important roles in modulating the inter-annual variability of surface ozone. However, there is no any evidence (figures or statistics) in the manuscript to support this conclusion.*

We thank the reviewer for pointing this out. That statement is indeed mostly a summary of previous research findings, not a primary focus or finding from this study. To avoid confusion, this statement in the abstract has now been removed.

#### References:

- Accadia, C., Mariani, S., Casaioli, M., Lavagnini, A., and Speranza, A.: Sensitivity of Precipitation Forecast Skill Scores to Bilinear Interpolation and a Simple Nearest-Neighbor Average Method on High-Resolution Verification Grids, *Weather and Forecasting*, 18, 918-932, [https://doi.org/10.1175/1520-0434\(2003\)018<0918:SOPFSS>2.0.CO;2](https://doi.org/10.1175/1520-0434(2003)018<0918:SOPFSS>2.0.CO;2), 2003.
- Ivatt, P. D. and Evans, M. J.: Improving the prediction of an atmospheric chemistry transport model using gradient-boosted regression trees, *Atmos. Chem. Phys.*, 20, 8063-8082, <https://doi.org/10.5194/acp-20-8063-2020>, 2020.
- Ma, R., Ban, J., Wang, Q., Zhang, Y., Yang, Y., He, M. Z., Li, S., Shi, W., and Li, T.: Random forest model based fine scale spatiotemporal O<sub>3</sub> trends in the Beijing-Tianjin-Hebei region in China, 2010 to 2017, *Environ Pollut*, 276, 116635, <https://doi.org/10.1016/j.envpol.2021.116635>, 2021.
- Meng, X., Wang, W., Shi, S., Zhu, S., Wang, P., Chen, R., Xiao, Q., Xue, T., Geng, G., Zhang, Q., Kan, H., and Zhang, H.: Evaluating the spatiotemporal ozone characteristics with high-resolution predictions in mainland China, 2013–2019, *Environmental Pollution*, 299, 118865, <https://doi.org/10.1016/j.envpol.2022.118865>, 2022.
- Monfreda, C., Ramankutty, N., and Foley, J. A.: Farming the planet: 2. Geographic distribution of crop areas, yields, physiological types, and net primary production in the year 2000, *Global Biogeochemical Cycles*, 22, <https://doi.org/10.1029/2007GB002947>, 2008.
- Thongthammachart, T., Araki, S., Shimadera, H., Eto, S., Matsuo, T., and Kondo, A.: An integrated model combining random forests and WRF/CMAQ model for high accuracy spatiotemporal PM<sub>2.5</sub> predictions in the Kansai region of Japan, *Atmospheric Environment*, 262, <https://doi.org/10.1016/j.atmosenv.2021.118620>, 2021.

Wang, L., Wang, S., Zhou, Y., Liu, W., Hou, Y., Zhu, J., and Wang, F.: Mapping population density in China between 1990 and 2010 using remote sensing, *Remote Sensing of Environment*, 210, 269-281, <https://doi.org/10.1016/j.rse.2018.03.007>, 2018.
